# Supplementary material
Source: Springer Nature journal article supplement (https://www.springermedizin.de/resource/supplementary/12943_2008_378_MOESM2_ESM.pdf/9554054)

**A.**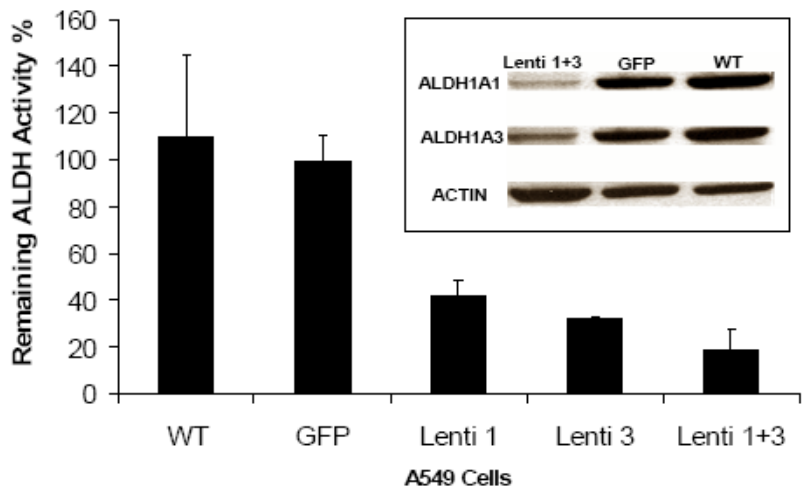**B.**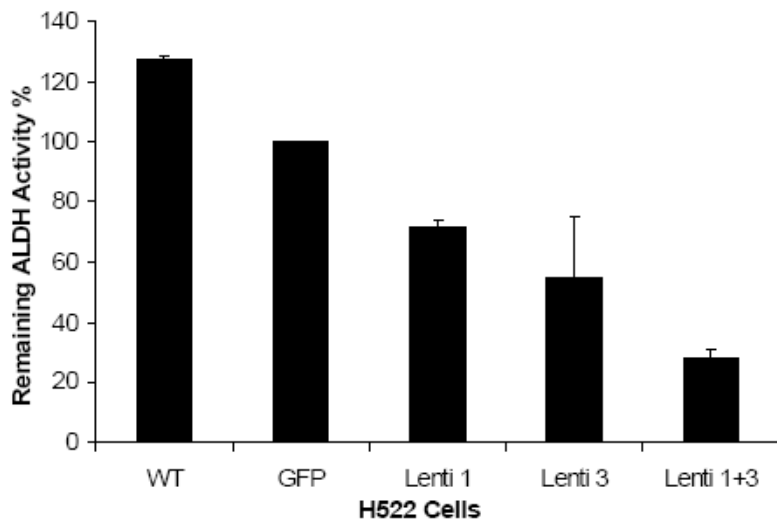

Supplement: MOESM2 [file 9554054]
